# Supplementary material for: Regulation by the quorum sensor from Vibrio indicates a receptor function for the membrane anchors of adenylate cyclases
Source: eLife. 2016 Feb 27;5:e13098. doi: 10.7554/eLife.13098 (PMC4821796; doi:10.7554/eLife.13098)
Supplement: Supplementary file 1. — DOI: http://dx.doi.org/10.7554/eLife.13098.013 [file elife-13098-supp1.xlsx]

## Sheet: Tabelle1
Primer-No.	Construct	Orientation	Sequenz 5´→3´
1	CqsS	s	aaaggatccatggacgcgattcgcaaa
2	Rv1625c (ΔXhoI)	as	aaaaagcttctagacccctgccgtgcgggg
3	Rv1625c218	s	aaaggatccagatctgaagcactgctggccaac
4	CqsS1-168-Rv1625c203-443	s	ttctacttccgtgatactgctcgagcg
5	CqsS1-168-Rv1625c203-443	as	agtatcacggaagtagaacaagttaccaaa
6	CqsS1-172-Rv1625c203-443	s	aaccaggtacgtgatactgctcgagcg
7	CqsS1-172-Rv1625c203-443	as	agtatcacgtacctggtttcggaagta
8	CqsS1-190-Rv1625c203-443	s	atcgcccatcgtgatactgctcgagcggag
9	CqsS1-190-Rv1625c203-443	as	agtatcacgatgggcgatacccgcccc
10	CqsS1-195-Rv1625c203-443	s	cgaaacccacgtgatactgctcgagcggag
11	CqsS1-195-Rv1625c203-443	as	agtatcacgtgggtttcgcatttcatg
12	CqsS1-196-Rv1625c203-443	s	aacccactccgtgatactgctcgagcggag
13	CqsS1-196-Rv1625c203-443	as	agtatcacggagtgggtttcgcatttc
14	CqsS1-168/172/181/190/195/196F166C-Rv1625c203-443	s	ggtaacttgtgctacttccg
15	CqsS1-168/172/181/190/195/196F166C-Rv1625c203-443	as	cggaagtagcacaagttacc
16	CqsS1-168F166C-Rv1625c201-443	s	tgctacttcgcgctgcgtgatactgct
17	CqsS1-168F166C-Rv1625c201-443	as	acgcagcgcgaagtagcacaagttacc
18	CqsS1-172F166C-Rv1625c201-443	s	aaccaggtagcgctgcgtgatactgct
19	CqsS1-172F166C-Rv1625c201-443	as	acgcagcgctacctggtttcggaagta
20	CqsS1-168F166C-Rv1625c202-443	s	tgctacttcctgcgtgatactgctcga
21	CqsS1-168F166C-Rv1625c202-443	as	atcacgcaggaagtagcacaagttacc
22	CqsS1-172F166C-Rv1625c202-443	s	aaccaggtactgcgtgatactgctcga
23	CqsS1-172F166C-Rv1625c202-443	as	atcacgcagtacctggtttcggaagta
24	CqsS1-168F166C-Rv1625c218-443	s	tgctacttccgctccgaagcactgctg
25	CqsS1-168F166C-Rv1625c218-443	as	ttcggagcggaagtagcacaagttacc
26	CqsS1-172F166C-Rv1625c218-443	s	aaccaggtacgctccgaagcactgctg
27	CqsS1-172F166C-Rv1625c218-443	as	ttcggagcgtacctggtttcggaagta
28	CqsS1-181F166C-Rv1625c218-443	s	tcaatcgcacgctccgaagcactgctg
29	CqsS1-181F166C-Rv1625c218-443	as	ttcggagcgtgcgattgagacttttgc
30	CqsS1-196F166C-Rv1625c218-443	as	aaaagatctgagtgggtttcgcatttc
31	CqsS1-195F166C-Rv1625c218-443	as	aaaagatcttgggtttcgcatttcatg
32	CqsS1-190F166C-Rv1625c218-443	as	aaaagatctatgggcgatacccgcccc
33	CqsS1-177-Rv1625c218-443	as	tttttcagatctttttgcttcatgttctac
34	CqsS1-188F166C-Rv1625c218-443	as	aaaagatctgatacccgccccaaaaga
35	CqsS1-187F166C-Rv1625c218-443	as	aaaagatctacccgccccaaaagactt
36	CqsS1-185F166C-Rv1625c218-443	as	aaaagatctcccaaaagactttgcgat
37	CqsS1-183F166C-Rv1625c218-443	as	aaaagatctagactttgcgattgagac
38	CqsS1-168F166A-Rv1625c218-443	as	ctggtttcggaagtaggccaagttaccaaagag
39	CqsS1-168F166D-Rv1625c218-443	s	tttggtaacttggattacttccgaaaccaggta
40	CqsS1-168F166E-Rv1625c218-443	s	ctctttggtaacttggaatacttccgaaaccag
41	CqsS1-168F166G-Rv1625c218-443	s	ctctttggtaacttgggctacttccgaaaccag
42	CqsS1-168F166H-Rv1625c218-443	s	ctctttggtaacttgcactacttccgaaaccag
43	CqsS1-168F166H-Rv1625c218-443	as	ctggtttcggaagtagtgcaagttaccaaagag
44	CqsS1-168F166I-Rv1625c218-443	s	ctctttggtaacttgatctacttccgaaaccag
45	CqsS1-168F166K-Rv1625c218-443	as	ctggtttcggaagtatttcaagttaccaaagag
46	CqsS1-168F166L-Rv1625c218-443	as	ctggtttcggaagtagagcaagttaccaaagag
47	CqsS1-168F166M-Rv1625c218-443	as	ctggtttcggaagtacatcaagttaccaaagag
48	CqsS1-168F166N-Rv1625c218-443	s	tttggtaacttgaactacttccgaaaccaggta
49	CqsS1-168F166P-Rv1625c218-443	s	ctctttggtaacttgccctacttccgaaaccag
50	CqsS1-168F166Q-Rv1625c218-443	as	gtttcggaagtattgcaagttaccaaagagata
51	CqsS1-168F166R-Rv1625c218-443	as	gtttcggaagtagcgcaagttaccaaagagata
52	CqsS1-168F166S-Rv1625c218-443	s	ctctttggtaacttgtcctacttccgaaaccag
53	CqsS1-168F166T-Rv1625c218-443	s	tttggtaacttgacctacttccgaaaccaggta
54	CqsS1-168F166V-Rv1625c218-443	as	ctggtttcggaagtagaccaagttaccaaagag
55	CqsS1-168F166W-Rv1625c218-443	s	ctctttggtaacttgtggtacttccgaaaccag
56	CqsS1-168F166W-Rv1625c218-443	as	ctggtttcggaagtaccacaagttaccaaagag
57	CqsS1-168F166Y-Rv1625c218-443	s	tttggtaacttgtattacttccgaaaccaggta
